# Supplementary material for: Value of Information Analysis Applied to the Economic Evaluation of Interventions Aimed at Reducing Juvenile Delinquency: An Illustration
Source: PubMed Central journal article supplement (PMC4493049; doi:10.1371/journal.pone.0131255), 2015-07-06
Supplement: pone.0131255.s001.pdf [file pone.0131255.s001.pdf]

Table S1. Model parameters and parameter distributions

| EVPPI group of parameters             | Parameters                       |                    |                                                                        |                    |             |                     |                                     |
|---------------------------------------|----------------------------------|--------------------|------------------------------------------------------------------------|--------------------|-------------|---------------------|-------------------------------------|
|                                       | <b>Transition probabilities</b>  | <b>Probability</b> | <b>Events</b>                                                          | <b>Complements</b> |             | <b>Distribution</b> | <b>Reference</b>                    |
| transition probabilities FFT          | <b><i>FFT</i></b>                |                    |                                                                        |                    |             |                     |                                     |
|                                       | tpA2A                            | 0.23               | 6                                                                      | 20                 |             | Dirichlet           | Multicentre trial                   |
|                                       | tpA2B                            | 0.77               | 20                                                                     | 6                  |             | Dirichlet           | Multicentre trial                   |
|                                       | tpB2A                            | 0.37               | 7                                                                      | 12                 |             | Dirichlet           | Multicentre trial                   |
|                                       | tpB2B                            | 0.63               | 12                                                                     | 7                  |             | Dirichlet           | Multicentre trial                   |
| transition probabilities Course House | <b><i>Course House</i></b>       |                    |                                                                        |                    |             |                     |                                     |
|                                       | tpA2A                            | 0.39               | 13                                                                     | 20                 |             | Dirichlet           | Slot et al. (1992)                  |
|                                       | tpA2B                            | 0.61               | 20                                                                     | 13                 |             | Dirichlet           | Slot et al. (1992)                  |
|                                       | tpB2A                            | 0.24               | 4                                                                      | 13                 |             | Dirichlet           | Slot et al. (1992)                  |
|                                       | tpB2B                            | 0.76               | 13                                                                     | 4                  |             | Dirichlet           | Slot et al. (1992)                  |
|                                       | <b>Intervention costs</b>        | <b>Mean</b>        | <b>SE mean*</b>                                                        | <b>alpha</b>       | <b>beta</b> | <b>Distribution</b> | <b>Reference</b>                    |
| intervention costs FFT                | FFT                              | € 10,900           | € 10,900                                                               | 1                  | 10900       | Gamma               | Costdata mental health institutions |
| intervention costs Course House       | Course House                     | € 37,800           | € 37,800                                                               | 1                  | 37800       | Gamma               | Slot et al. (1992)                  |
|                                       |                                  |                    | * SE was not known, therefore taken conservative and set equal to mean |                    |             |                     |                                     |
|                                       | <b>Model state costs</b>         | <b>Mean</b>        | <b>SE mean</b>                                                         | <b>alpha</b>       | <b>beta</b> | <b>Distribution</b> | <b>Reference</b>                    |
|                                       | <b><i>Criminal state (A)</i></b> |                    |                                                                        |                    |             |                     |                                     |
| direct health-care costs criminal     | Direct health-care - adolescent  |                    |                                                                        |                    |             |                     |                                     |
|                                       | Psychiatrist                     | € 112              | € 67                                                                   | 2.8                | 39.9        | Gamma               | Multicentre trial                   |
|                                       | Psychologist                     | € 183              | € 103                                                                  | 3.2                | 57.5        | Gamma               | Multicentre trial                   |
|                                       | Psychiatric nurse                | € 47               | € 47                                                                   | 1.0                | 47.2        | Gamma               | Multicentre trial                   |
|                                       | Social worker                    | € 113              | € 78                                                                   | 2.1                | 54.2        | Gamma               | Multicentre trial                   |
|                                       | GP                               | € 43               | € 26                                                                   | 2.7                | 15.6        | Gamma               | Multicentre trial                   |
|                                       | <i>GP at school</i>              | € 3                | € 3                                                                    | 1.0                | 3.0         | Gamma               | Multicentre trial                   |

|                                       |                                     |         |         |       |        |       |                   |
|---------------------------------------|-------------------------------------|---------|---------|-------|--------|-------|-------------------|
|                                       | <i>Pediatrician</i>                 | € 0     | € 0     | 0.0   | 0.0    | Gamma | Multicentre trial |
|                                       | Medical specialist                  | € 8     | € 1     | 100.0 | 0.1    | Gamma | Multicentre trial |
|                                       | Alternative healer                  | € 0     | € 0     | 0.0   | 0.0    | Gamma | Multicentre trial |
|                                       | <i>Family guardian</i>              | € 0     | € 0     | 0.0   | 0.0    | Gamma | Multicentre trial |
|                                       | <i>Youth welfare agency</i>         | € 142   | € 75    | 3.6   | 39.5   | Gamma | Multicentre trial |
|                                       | ER                                  | € 66    | € 50    | 1.7   | 38.4   | Gamma | Multicentre trial |
|                                       | <i>Foster care</i>                  | € 0     | € 0     | 0.0   | 0.0    | Gamma | Multicentre trial |
|                                       | Residential institution             | € 25    | € 25    | 1.0   | 25.3   | Gamma | Multicentre trial |
|                                       | Day hospitalization                 | € 0     | € 0     | 0.0   | 0.0    | Gamma | Multicentre trial |
|                                       | Hospitalization                     | € 1,438 | € 1,438 | 1.0   | 1437.5 | Gamma | Multicentre trial |
|                                       | Centre for addiction treatment      | € 0     | € 0     | 0.0   | 0.0    | Gamma | Multicentre trial |
|                                       | Direct health-care - parent         |         |         |       |        |       |                   |
|                                       | Psychiatrist                        | € 61    | € 61    | 1.0   | 61.1   | Gamma | Multicentre trial |
|                                       | Psychologist                        | € 55    | € 47    | 1.4   | 40.5   | Gamma | Multicentre trial |
|                                       | Psychiatric nurse                   | € 0     | € 0     | 0.0   | 0.0    | Gamma | Multicentre trial |
|                                       | Social worker                       | € 6     | € 6     | 1.0   | 5.9    | Gamma | Multicentre trial |
|                                       | GP                                  | € 94    | € 71    | 1.7   | 53.9   | Gamma | Multicentre trial |
|                                       | Medical officer                     | € 12    | € 7     | 3.3   | 3.7    | Gamma | Multicentre trial |
|                                       | Medical specialist                  | € 21    | € 15    | 2.0   | 10.9   | Gamma | Multicentre trial |
|                                       | Alternative healer                  | € 9     | € 9     | 1.0   | 9.1    | Gamma | Multicentre trial |
|                                       | <i>Family guardian</i>              | € 0     | € 0     | 0.0   | 0.0    | Gamma | Multicentre trial |
|                                       | Centre for addiction treatment      | € 80    | € 80    | 1.0   | 79.7   | Gamma | Multicentre trial |
| direct non health-care costs criminal | Direct non health-care - adolescent |         |         |       |        |       |                   |
|                                       | <i>Council of child protection</i>  | € 25    | € 16    | 2.3   | 10.7   | Gamma | Multicentre trial |
|                                       | <i>Bureau Halt</i>                  | € 44    | € 27    | 2.8   | 15.9   | Gamma | Multicentre trial |
|                                       | Police                              | € 90    | € 37    | 6.0   | 15.0   | Gamma | Multicentre trial |

|                                         |                                                        |         |         |     |        |       |                   |  |
|-----------------------------------------|--------------------------------------------------------|---------|---------|-----|--------|-------|-------------------|--|
|                                         | Lawyer                                                 | € 57    | € 57    | 1.0 | 57.1   | Gamma | Multicentre trial |  |
|                                         | Court                                                  | € 29    | € 29    | 1.0 | 28.6   | Gamma | Multicentre trial |  |
|                                         | Social rehabilitation                                  | € 171   | € 111   | 2.4 | 71.4   | Gamma | Multicentre trial |  |
|                                         | <i>Incarceration costs</i>                             | € 0     | € 0     | 0.0 | 0.0    | Gamma | Multicentre trial |  |
| indirect non health-care costs criminal | Indirect non health-care - adolescent                  |         |         |     |        |       |                   |  |
|                                         | <i>Time spent on exercises as part of intervention</i> | € 3     | € 2     | 1.9 | 1.6    | Gamma | Multicentre trial |  |
|                                         | Indirect non health-care - parent                      |         |         |     |        |       |                   |  |
|                                         | Absence from work                                      | € 1,317 | € 835   | 2.5 | 528.8  | Gamma | Multicentre trial |  |
|                                         | Inefficiency at work                                   | € 4,450 | € 2,775 | 2.6 | 1730.4 | Gamma | Multicentre trial |  |
|                                         | Productivity losses due to unpaid support              | € 0     | € 0     | 0.0 | 0.0    | Gamma | Multicentre trial |  |
|                                         | Productivity losses due to paid support                | € 0     | € 0     | 0.0 | 0.0    | Gamma | Multicentre trial |  |
|                                         | <i>Time spent on exercises as part of intervention</i> | € 2     | € 2     | 1.0 | 2.1    | Gamma | Multicentre trial |  |
|                                         | <b>Non Criminal state (B)</b>                          |         |         |     |        |       |                   |  |
| direct health-care costs non criminal   | Direct health-care - adolescent                        |         |         |     |        |       |                   |  |
|                                         | Psychiatrist                                           | € 31    | € 17    | 3.3 | 9.2    | Gamma | Multicentre trial |  |
|                                         | Psychologist                                           | € 78    | € 45    | 3.1 | 25.4   | Gamma | Multicentre trial |  |
|                                         | Psychiatric nurse                                      | € 0     | € 0     | 0.0 | 0.0    | Gamma | Multicentre trial |  |
|                                         | Social worker                                          | € 60    | € 45    | 1.8 | 33.9   | Gamma | Multicentre trial |  |
|                                         | GP                                                     | € 42    | € 15    | 8.3 | 5.1    | Gamma | Multicentre trial |  |
|                                         | <i>GP at school</i>                                    | € 0     | € 0     | 0.0 | 0.0    | Gamma | Multicentre trial |  |
|                                         | <i>Pediatrician</i>                                    | € 0     | € 0     | 0.0 | 0.0    | Gamma | Multicentre trial |  |
|                                         | Medical specialist                                     | € 12    | € 8     | 2.0 | 5.6    | Gamma | Multicentre trial |  |
|                                         | Alternative healer                                     | € 0     | € 0     | 0.0 | 0.0    | Gamma | Multicentre trial |  |
|                                         | <i>Family guardian</i>                                 | € 16    | € 12    | 1.9 | 8.4    | Gamma | Multicentre trial |  |
|                                         | <i>Youth welfare agency</i>                            | € 47    | € 27    | 3.0 | 15.7   | Gamma | Multicentre trial |  |

|                      |                                       |       |       |       |       |       |                   |
|----------------------|---------------------------------------|-------|-------|-------|-------|-------|-------------------|
|                      | ER                                    | € 30  | € 2   | 289.6 | 0.1   | Gamma | Multicentre trial |
|                      | <i>Foster care</i>                    | € 0   | € 0   | 0.0   | 0.0   | Gamma | Multicentre trial |
|                      | Residential institution               | € 247 | € 247 | 1.0   | 246.6 | Gamma | Multicentre trial |
|                      | Day hospitalization                   | € 0   | € 0   | 0.0   | 0.0   | Gamma | Multicentre trial |
|                      | Hospitalization                       | € 9   | € 9   | 1.0   | 9.4   | Gamma | Multicentre trial |
|                      | Centre for addiction treatment        | € 0   | € 0   | 0.0   | 0.0   | Gamma | Multicentre trial |
|                      | Direct health-care - parent           |       |       |       |       |       |                   |
|                      | Psychiatrist                          | € 0   | € 0   | 0.0   | 0.0   | Gamma | Multicentre trial |
|                      | Psychologist                          | € 80  | € 40  | 3.9   | 20.3  | Gamma | Multicentre trial |
|                      | Psychiatric nurse                     | € 0   | € 0   | 0.0   | 0.0   | Gamma | Multicentre trial |
|                      | Social worker                         | € 17  | € 17  | 1.0   | 16.8  | Gamma | Multicentre trial |
|                      | GP                                    | € 18  | € 7   | 5.9   | 3.0   | Gamma | Multicentre trial |
|                      | Medical officer                       | € 6   | € 6   | 1.0   | 6.1   | Gamma | Multicentre trial |
|                      | Medical specialist                    | € 39  | € 2   | 292.4 | 0.1   | Gamma | Multicentre trial |
|                      | Alternative healer                    | € 0   | € 0   | 0.0   | 0.0   | Gamma | Multicentre trial |
|                      | <i>Family guardian</i>                | € 27  | € 19  | 1.9   | 14.3  | Gamma | Multicentre trial |
|                      | Centre for addiction treatment        | € 0   | € 0   | 0.0   | 0.0   | Gamma | Multicentre trial |
|                      | Direct non health-care - adolescent   |       |       |       |       |       |                   |
|                      | <i>Council of child protection</i>    | € 0   | € 0   | 0.0   | 0.0   | Gamma | Multicentre trial |
|                      | <i>Bureau Halt</i>                    | € 12  | € 9   | 1.6   | 7.2   | Gamma | Multicentre trial |
|                      | Police                                | € 25  | € 15  | 3.0   | 8.4   | Gamma | Multicentre trial |
|                      | Lawyer                                | € 0   | € 0   | 0.0   | 0.0   | Gamma | Multicentre trial |
|                      | Court                                 | € 0   | € 0   | 0.0   | 0.0   | Gamma | Multicentre trial |
|                      | Social rehabilitation                 | € 36  | € 29  | 1.6   | 23.0  | Gamma | Multicentre trial |
|                      | <i>Incarceration costs</i>            | € 0   | € 0   | 0.0   | 0.0   | Gamma | Multicentre trial |
| indirect non health- | Indirect non health-care - adolescent |       |       |       |       |       |                   |

|                            |                                                            |         |         |     |       |       |                   |
|----------------------------|------------------------------------------------------------|---------|---------|-----|-------|-------|-------------------|
| care costs non<br>criminal | <i>Time spent on exercises<br/>as part of intervention</i> | € 4     | € 4     | 1.2 | 3.4   | Gamma | Multicentre trial |
|                            | Indirect non health-care – parent                          |         |         |     |       |       |                   |
|                            | Absence from work                                          | € 1,020 | € 558   | 3.3 | 305.9 | Gamma | Multicentre trial |
|                            | Inefficiency at work                                       | € 3,866 | € 1,503 | 6.6 | 584.5 | Gamma | Multicentre trial |
|                            | Productivity losses due to<br>unpaid support               | € 0     | € 0     | 0.0 | 0.0   | Gamma | Multicentre trial |
|                            | Productivity losses due to<br>paid support                 | € 0     | € 0     | 0.0 | 0.0   | Gamma | Multicentre trial |
|                            | <i>Time spent on exercises<br/>as part of intervention</i> | € 8     | € 5     | 2.7 | 2.8   | Gamma | Multicentre trial |

*Italics - costs not relevant from 23 years onwards*

EVPPPI, Expected Value of Partial Perfect Information; FFT, Functional Family Therapy; SE, Standard error
