# Supplementary material for: Value of Information Analysis Applied to the Economic Evaluation of Interventions Aimed at Reducing Juvenile Delinquency: An Illustration
Source: PubMed Central journal article supplement (PMC4493049; doi:10.1371/journal.pone.0131255), 2015-07-06
Supplement: pone.0131255.s002.pdf [file pone.0131255.s002.pdf]

Table S2. pEVPI and pEVPPI for a range of WTP values

| WTP       | transition probabilities FFT | transition probabilities Course House | direct health-care costs criminal | direct health-care costs non criminal | direct non health-care costs criminal | direct non health-care costs non criminal | indirect non health-care costs criminal | indirect non health-care costs non criminal | intervention costs FFT | intervention costs Course House | pEVPI         |
|-----------|------------------------------|---------------------------------------|-----------------------------------|---------------------------------------|---------------------------------------|-------------------------------------------|-----------------------------------------|---------------------------------------------|------------------------|---------------------------------|---------------|
| € 0       | € 0                          | € 0                                   | € 0                               | € 0                                   | € 0                                   | € 0                                       | € 0                                     | € 0                                         | € 1,798,900            | € 5,646,700                     | € 11,911,500  |
| € 5,000   | € 23,000                     | € 0                                   | € 0                               | € 0                                   | € 1,700                               | € 0                                       | € 2,300                                 | € 0                                         | € 2,462,300            | € 9,568,600                     | € 18,197,300  |
| € 10,000  | € 919,600                    | € 1,990,500                           | € 0                               | € 0                                   | € 12,400                              | € 0                                       | € 13,300                                | € 0                                         | € 3,351,400            | € 14,051,900                    | € 28,674,800  |
| € 15,000  | € 6,402,400                  | € 11,155,100                          | € 0                               | € 0                                   | € 21,200                              | € 900                                     | € 41,300                                | € 0                                         | € 4,519,500            | € 19,242,800                    | € 42,195,800  |
| € 20,000  | € 16,263,300                 | € 24,720,800                          | € 600                             | € 0                                   | € 29,800                              | € 0                                       | € 107,000                               | € 0                                         | € 6,029,400            | € 25,103,700                    | € 57,847,600  |
| € 25,000  | € 28,832,200                 | € 40,322,400                          | € 8,900                           | € 0                                   | € 34,300                              | € 0                                       | € 255,400                               | € 0                                         | € 7,980,200            | € 31,601,900                    | € 74,913,300  |
| € 30,000  | € 42,919,000                 | € 57,149,700                          | € 16,900                          | € 0                                   | € 60,400                              | € 0                                       | € 609,000                               | € 10,700                                    | € 10,567,700           | € 38,703,200                    | € 92,970,400  |
| € 35,000  | € 57,863,500                 | € 74,630,700                          | € 41,300                          | € 0                                   | € 264,800                             | € 10,700                                  | € 1,761,100                             | € 559,100                                   | € 14,004,000           | € 46,337,600                    | € 111,815,800 |
| € 40,000  | € 70,749,600                 | € 89,965,700                          | € 590,500                         | € 357,800                             | € 1,546,500                           | € 1,089,900                               | € 3,732,300                             | € 2,326,300                                 | € 15,926,700           | € 51,773,800                    | € 128,621,700 |
| € 45,000  | € 73,470,900                 | € 95,078,000                          | € 0                               | € 0                                   | € 185,800                             | € 24,000                                  | € 374,800                               | € 21,300                                    | € 8,788,000            | € 47,140,300                    | € 135,339,200 |
| € 50,000  | € 76,407,100                 | € 100,394,600                         | € 0                               | € 0                                   | € 75,900                              | € 32,500                                  | € 20,300                                | € 0                                         | € 3,432,200            | € 42,879,500                    | € 142,393,000 |
| € 55,000  | € 79,537,400                 | € 105,903,400                         | € 0                               | € 0                                   | € 42,900                              | € 35,000                                  | € 800                                   | € 0                                         | € 427,800              | € 38,985,800                    | € 149,713,600 |
| € 60,000  | € 82,789,400                 | € 111,483,800                         | € 0                               | € 0                                   | € 25,100                              | € 37,500                                  | € 0                                     | € 0                                         | € 0                    | € 35,421,100                    | € 157,238,100 |
| € 65,000  | € 86,144,500                 | € 117,144,600                         | € 0                               | € 0                                   | € 14,200                              | € 40,000                                  | € 0                                     | € 0                                         | € 0                    | € 32,177,300                    | € 164,940,500 |
| € 70,000  | € 89,582,300                 | € 122,808,500                         | € 0                               | € 0                                   | € 9,400                               | € 42,500                                  | € 0                                     | € 0                                         | € 0                    | € 29,245,900                    | € 172,780,800 |
| € 75,000  | € 93,083,900                 | € 128,578,700                         | € 0                               | € 0                                   | € 7,300                               | € 44,900                                  | € 0                                     | € 0                                         | € 0                    | € 26,603,300                    | € 180,738,000 |
| € 80,000  | € 96,638,800                 | € 134,392,600                         | € 0                               | € 0                                   | € 6,700                               | € 47,400                                  | € 0                                     | € 0                                         | € 0                    | € 24,164,400                    | € 188,804,300 |
| € 85,000  | € 100,232,100                | € 140,405,200                         | € 0                               | € 0                                   | € 6,100                               | € 49,900                                  | € 0                                     | € 0                                         | € 0                    | € 21,956,200                    | € 196,955,500 |
| € 90,000  | € 103,864,300                | € 146,115,500                         | € 0                               | € 0                                   | € 5,400                               | € 52,300                                  | € 0                                     | € 0                                         | € 0                    | € 19,947,500                    | € 205,186,900 |
| € 95,000  | € 107,525,900                | € 152,098,000                         | € 0                               | € 0                                   | € 4,800                               | € 54,700                                  | € 0                                     | € 0                                         | € 0                    | € 18,102,800                    | € 213,485,700 |
| € 100,000 | € 111,211,000                | € 157,921,800                         | € 0                               | € 0                                   | € 4,100                               | € 57,200                                  | € 0                                     | € 0                                         | € 0                    | € 16,420,600                    | € 221,852,400 |

WTP, willingness-to-pay; FFT, Functional Family Therapy; pEVPI, population Expected Value of Perfect Information; pEVPPI, population Expected Value of Partial Perfect Information
